# Supplementary material
Source: PubMed Central journal article supplement (PMC1852781)
Supplement: 7601655s1.pdf [file 7601655s1.pdf]

# supplementary Figure CtsR phosphorylation

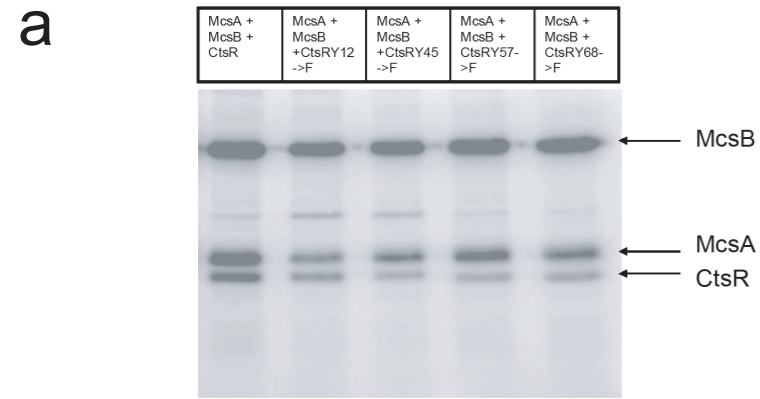

Phosphorylation of the single tyrosine mutation variants of CtsR. The Autoradiogram of the kinase assay with McsB, McsA, CtsR or the CtsR variants is depicted.

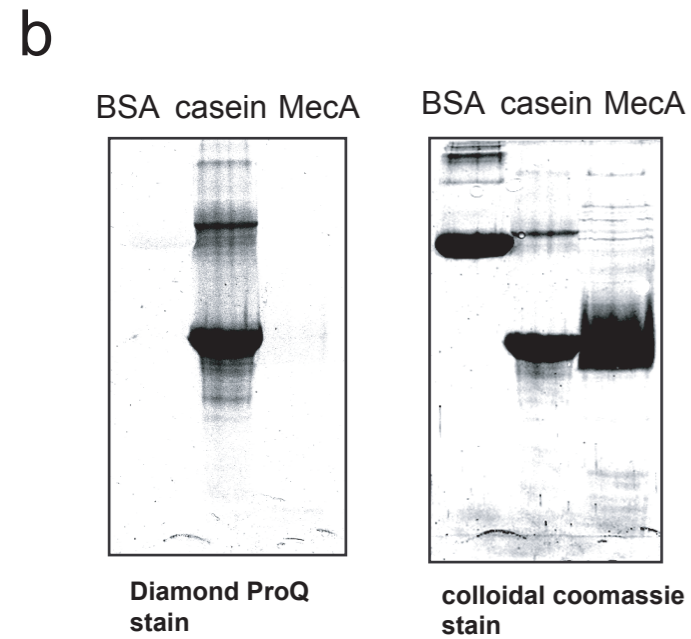

BSA,  $\alpha$ -Casein and MecA separated by SDS-PAGE and sequentially stained with Diamond ProQ (Phospho-protein) and colloidal coomassie (protein)

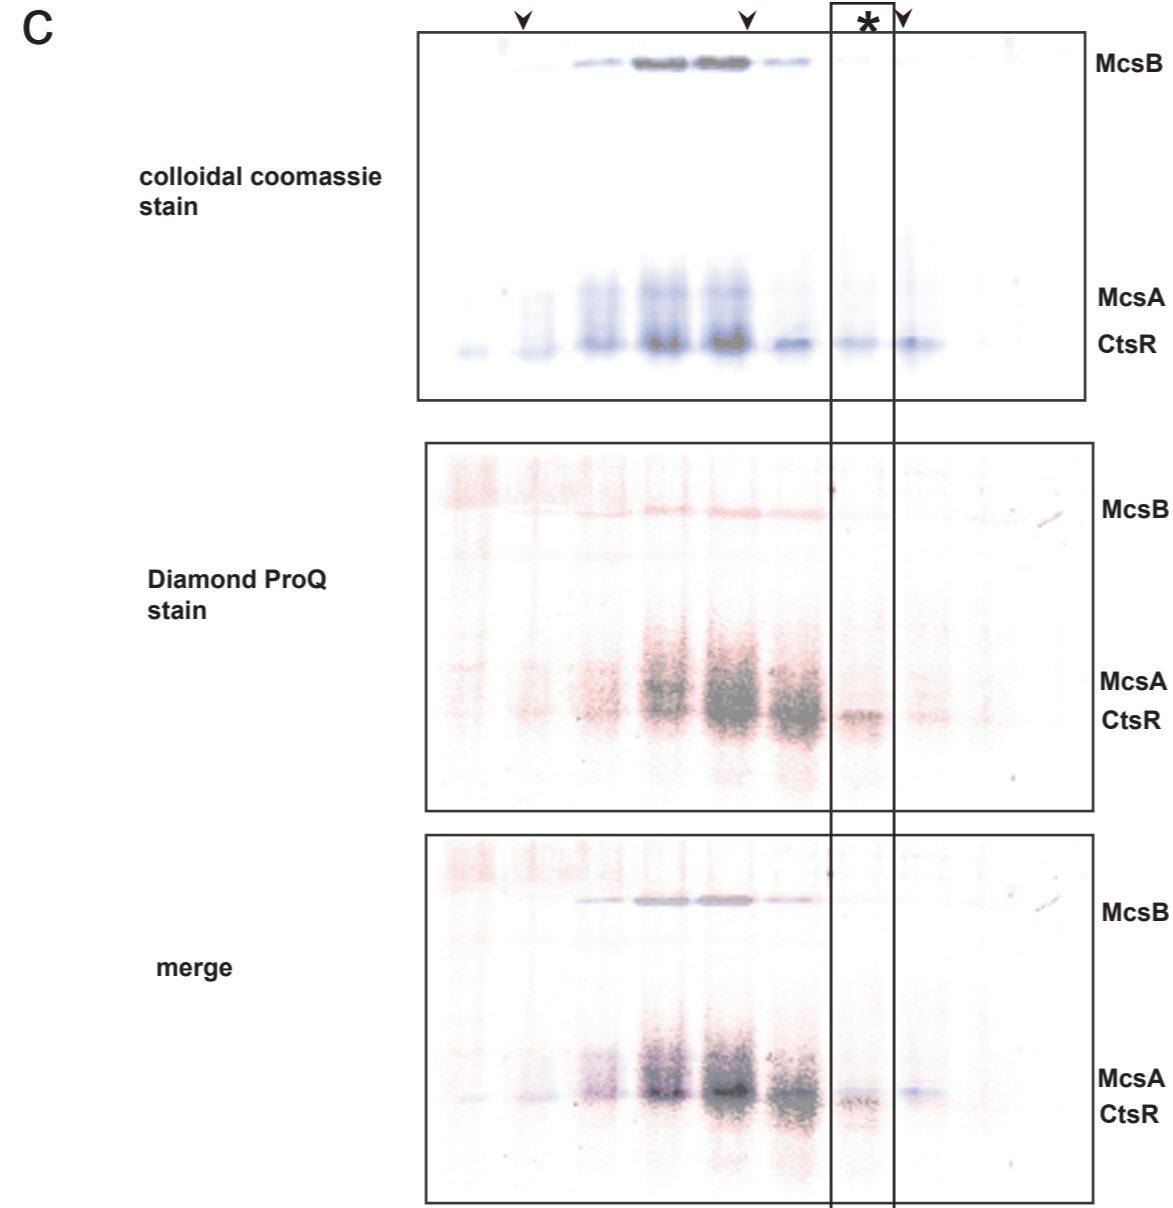

Fractions from the Gelfiltration of McsB, McsA, CtsR incubated in the presence of ATP, separated by SDS-PAGE and stained. The indicated Fraction was used for the experiment depicted in Fig 2d.
